# Supplementary material for: Recapitulating aortic valve disease hemodynamics with a highly tunable bio-inspired soft robotic aortic sleeve
Source: Research Square preprint supplement (doi:10.21203/rs.3.rs-713582/v1), 2021-07-22
Supplement: Supplementary file 1 [file 9f4a74df93eb80761be9cf4c.docx]

**Supplementary Information**

Table of Contents

[Bio-inspired soft robotic aortic sleeve manufacture 2](#_Toc76507153)

[***Figure S1: Aortic sleeve manufacturing steps.*** 3](#_Toc76507154)

[In silico modeling 4](#_Toc76507155)

[Lumped-parameter (LP) modeling 4](#_Toc76507156)

[Baseline model definition 4](#_Toc76507157)

[Aortic constriction 4](#_Toc76507158)

[***Table S1: Input parameters of the lumped-parameter model.*** 5](#_Toc76507159)

[***Table S2: Simulated LV hemodynamics on lumped-parameter model.*** 6](#_Toc76507160)

[Computational Fluid Dynamics (CFD) modeling 7](#_Toc76507161)

[***Figure S2: Inlet and outlet waveforms for CFD modeling.*** 8](#_Toc76507162)

[Histology studies 9](#_Toc76507163)

[Animal preparation 9](#_Toc76507164)

[Implanted samples 9](#_Toc76507165)

[Results 9](#_Toc76507166)

[**Figure S3: Histology studies.** 10](#_Toc76507167)

[In vivo studies 11](#_Toc76507168)

[Animal preparation 11](#_Toc76507169)

[Pre-Implantation procedure 11](#_Toc76507170)

[Sleeve implantation and tensioning 11](#_Toc76507171)

[Post-implantation procedure 11](#_Toc76507172)

[Animal preparation for MRI studies 11](#_Toc76507173)

[Animal anesthesia recovery 12](#_Toc76507174)

[Animal sacrifice 12](#_Toc76507175)

[***Figure S4: Effects of aortic sleeve tensioning.*** 13](#_Toc76507176)

[Magnetic resonance imaging 14](#_Toc76507177)

[LV geometry reconstruction 14](#_Toc76507178)

[4D flow analysis 14](#_Toc76507179)

[***Figure S5: LVEF MRI measurements.*** 15](#_Toc76507180)

[***Figure S6: Comparison between MRI and CFD model.*** 16](#_Toc76507181)

[Data processing and visualization 17](#_Toc76507182)

[**Table S3A: *In vivo* hemodynamic measurements at various constriction degrees**. 18](#_Toc76507183)

[***Table S3B: P values matrices of hemodynamics at various constriction degrees.*** 18](#_Toc76507184)

[***Table 4A: In vivo hemodynamic data for various constriction profiles***. 19](#_Toc76507185)

[***Table S4B: P values matrices of hemodynamics for various constriction profile.*** 19](#_Toc76507186)

[Supplementary References 20](#_Toc76507187)

[Supplementary Videos 20](#_Toc76507188)

# Bio-inspired soft robotic aortic sleeve manufacture

Two sheets of thermoplastic polyurethane (TPU) (HTM 8001-M 80A shore polyether film, 0.012” thick, American Polyfilm, Inc) were mounted, individually, on a vacuum thermal former (Yescom Dental Vacuum Former, Generic). A 3D-printed object of the desired shape of the expandable component of the sleeve (Objet 30 3D printer, Stratasys) was placed on the vacuum platform and used as the positive mold (**Fig. S1a**). Each TPU sheet was heated until it achieved uniform sagging, and then lowered over the positive mold.

Holes were opened in the geometrical center of each of the three pockets of one formed TPU sheet using a hole punch. PVC connectors (polycarbonate plastic barbed tube fitting for 1/16" tube ID, McMaster-Carr) were cut in half using a bandsaw, their edges smoothed using a hand file, and inserted one through each of the three openings (**Fig. S1b**).

The two TPU sheets were then mounted on the negative mold on a heat press transfer machine (Heat Transfer Machine QXAi, Powerpress). The sheet containing the three openings is placed on top of the other sheet, with the connectors facing upwards. A Teflon sheet was placed on top of the TPU to prevent melting of the TPU during the procedure. Heat is then applied (320F) for 10 seconds (**Fig. S1 c-e**). Three soft tubes (latex rubber 1/16" ID 1/8" OD tubing, McMaster-Carr) were then secured to the connectors (**Fig. S1f**). These make the actuation lines, which enable independent activation of each of the three compartments, or pockets, of the actuator.

A TPU-coated inelastic fabric (Oxford fabric, Seattle fabrics Inc.) is heat-sealed to the bottom edges of the actuator, with holes corresponding to the actuation lines. The fabric sheet is finally cut to shape to create a slit along its short side and a strip on its long axis for positioning around the aorta (**Fig. S1 g-h**). An image of a fully assembled actuator is shown in **Fig. S1i**.

***Figure S1: Aortic sleeve manufacturing steps.*** a) A thermoplastic polyurethane (TPU) sheet is mounted on a vacuum forming machine with the positive mold placed on the molding bed. b) Two formed TPU sheets juxtaposed, with details of the connectors inserted through the three pockets of one sheet. c) Two formed TPU juxtaposed with the negative mold. d) Heat-press set-up with two TPU sheets on the negative mold and a Teflon sheet on top. e) Enclosed actuator bladder following sealing of the two TPU sheets. f) Actuator bladder with the three actuation hydraulic lines attached to the connectors. g) Actuator bladder on the inextensible TPU-coated fabric layer. The three hydraulic lines go through the corresponding holes opened in the fabric. h) Heat-sealing of the TPU-coated fabric on the actuator bladder. i) View of the fully assembled aortic sleeve.

# *In silico* modeling

## Lumped-parameter (LP) modeling

### Baseline model definition

The lumped-parameter model adopted in this work was developed on SIMSCAPE FLUIDSTM and is based on our previously published work1. Here, we readapted our model originally developed to recapitulate human hemodynamics to the porcine physiology. **Table S1** summarizes the set of parameters assigned to the constitutive elements of the domain, when these differ from those defined in our previous work due to anatomical, physiological, and hemodynamic differences between swine and humans. Specifically, the dimensions of each heart chamber and proximal vasculature were obtained via Magnetic Resonance Imaging (MRI), whereas lumped-parameter resistances and compliances of the peripheral and pulmonary circulations were adjusted to approximate the hemodynamics measured *in vivo* at baseline. A comparison of the left ventricular (LV) hemodynamics obtained *in silico* and measured *in vivo* is provided in **Table S2**.

### Aortic constriction

Aortic constriction is modeled through a *Band* hydraulic pipeline element of the length of the expandable element of the actuator inserted distally to the aortic valve. The luminal cross-sectional area of the *Band* element was reduced by 80% and 90% to simulate intermediate and full constriction respectively. Correspondingly, the peak angular velocity associated with the pump was increased by 4% and 15% to model changes in cardiac contractility.

Calculations of the maximum transaortic pressure gradient for comparison with the *in vitro* model were obtained for aortic constrictions of 10% to 90% in 10%-step increments. In this simulation, changes in cardiac contractility were neglected to allow for comparison with the mock circulatory loop set-up.

### ***Table S1: Input parameters of the lumped-parameter model.***

|  | Diameter [cm] | Length [cm] | | Compliance [m Pa-1] a) |
| --- | --- | --- | --- | --- |
| Left ventricle | 3.6 | 4.3 | | 0.02 – 1 10-6 |
| Right ventricle | 1.3 | 3.6 | | 1.8 – 5.5 10-5 |
| Left atrium | 2.5 | 2.5 | | 0.8 – 1.7 10-5 |
| Right atrium | 1.8 | 1.8 | | 1.9 – 2.3 10-5 |
| Band | 2.4 | 1.4 | | 0 |
| Ascending aorta | 2.4 | 2 | | 3.5 10-7 |
| Descending aorta | 0.8 | 10 | | 1.7 10-6 |
| Thoracic aorta | 0.5 | 35 | | 4.0 10-7 |
| Pulmonary artery | 1.5 | 3.7 | | 2.2 10-7 |
| SVC b) | 1.5 | 5.0 | | 5.0 10-6 |
| Abdominal IVC c) | 1.0 | 12.1 | | 4.4 10-6 |
| Thoracic IVC | 1.0 | 1.8 | | 6.4 10-7 |
|  | Area [cm2] |  | |  |
| Aortic valve | 2.5 |  | |  |
| Pulmonary valve | 1.4 |  | |  |
| Mitral valve | 2.8 |  | |  |
| Aortic valve | 2.5 |  | |  |
|  | Resistance [Pa s m-3] d) | Volumed) [L] | | Compliance [m Pa-1] |
| Upper body | 0.07 – 1.4 108 | 0.64 | | 6.7 10-8 |
| Abdominal | 0.04 – 0.6 108 | 1.45 | | 3.6 10-8 |
| Lower body | 0.10 – 1.2 1082 | 0.37 | | 4.1 10-8 |
| Pulmonary | 0.17 – 1.65 107 | 0.4 | | 6 10-7 |
|  | Angular velocity [rad s-1] a) | |  |  |
| Centrifugal pump | 0 – 42.4 |  | |  |

a)Input range, with the two entries corresponding to the minimum and maximum values; b)Superior Vena Cava; c)Inferior Vena Cava; d) Input range, with the two values corresponding to the venous and the arterial resistances respectively.

***Table S2: Simulated LV hemodynamics on lumped-parameter model.*** Comparison of LV hemodynamics at baseline between lumped-parameter model and *in vivo* data obtained from LV catheterization.

###

| Parameter | Simulation | *In vivo* |
| --- | --- | --- |
| **Cardiac output [L min-1]** | 4.0 | 3.7 ± 0.5 |
| **Stroke volume [mL]** | 40.3 | 44.4 ± 2.9 |
| **LV pressure [mmHg]** | | |
| Systolic | 93.2 | 90.3 ± 9.5 |
| Diastolic | 2.1 | 5.2 ± 8.6 |
| **LV volume [mL]** |  |  |
| Systolic | 69.7 | 69.1 ± 6.4 |
| Diastolic | 110.0 | 112.7 ± 8.8 |

## Computational Fluid Dynamics (CFD) modeling

XFlow 2020 (Dassault Systèmes) was utilized to model the flow patterns resulting from pocket-selective activation of the soft robotic sleeve at the ascending aorta. Traditional numerical techniques are based on approaches that use finite volumes and finite elements, which are applied to Navier-Stokes equations. Despite Navier-Stokes solvers having been broadly employed in the literature, they suffer from several disadvantages, including inaccurate meshing and extremely empirical turbulence simulations (e.g., RANS)6. The lattice Boltzmann formulation used in XFlow was developed to overcome these limitations.

In this study, a Large-Eddy Simulation (LES) turbulence model is utilized in XFlow software using a particle-based and fully Lagrangian approach. The blood was modeled as an incompressible Newtonian fluid with 1050 kg/m3 density and 0.0035 Pas dynamic viscosity. Turbulence was simulated using the Wall-Adapting Local Eddy viscosity model6,7. The deformed structure of the ascending aorta was imported into the XFlow domain for each actuation profile. The inlet surface of the ascending aorta was extended further to facilitate convergence. The inlet was defined as a pressure input source imposing *in vivo* pressure measurements of the ascending aorta through LV catheterization (**Fig. S2a**). Flow rate data were used at the descending aorta as a mass flow outflow source (**Fig. S2b**). Outflow boundary conditions at two branch arteries, the brachiocephalic trunk (BCT) and the left subclavian artery (LSA) were assumed to account for 10% and 7.5% of the flow volume at descending aorta, respectively. These values were approximated based on their cross-sectional outlet area and assumed constant during the cardiac cycle. The wall surface was considered to be rigid, and the no-slip condition was applied. The total simulation time was set to 1.45 seconds (~2 cycles) and the time step ∆t = 1x10-5s was applied for each simulation to ensure numerical stability. Grid independency was achieved at 0.8 mm resolution with approximately 159,000 elements. The refinement method with 0.2 mm resolution was applied near the walls to ensure a sufficient amount of lattice elements at the constriction region as a boundary layer. Analysis was completed in ~6 hours on a desktop PC with a 3.0 GHZ i7-9700 processor with 8 cores and 32 GB RAM.

***Figure S2: Inlet and outlet waveforms for CFD modeling.*** a) Ascending aorta pressure waveform as the inlet boundary condition; b) Descending aorta flow waveform as the outlet boundary condition of the computational fluid dynamics (CFD) model. These waveforms were obtained *in vivo* and show mean ± SD of three consecutive representative cycles for each data point.

# Histology studies

Histology studies to investigate the response to each of the materials were conducted in one Sprague Dawley rat (weight at surgery = 267g) sourced by the Charles River Laboratories. All animal procedures were approved by the Institutional Animal Care and Use Committee (IACUC) of our institute.

## Animal preparation

The rat was anesthetized using 2-4% Isoflurane per O2 in effect following weighing. Sterile eye ointment was applied after anesthesia and before shaving to protect the eyes from drying and minimize hair in the eye. The back of the animal was shaved. The rat was then intubated for mechanical ventilation and the success of the intubation was verified with a dental mirror placed at the end of the catheter inserted into the trachea. The mechanical ventilator was connected to the catheter via a luer connector on the end of an extension line on the ventilator output, and the chest of the animal was observed to ensure that the lungs were inflating and deflating in synchrony with the ventilator. Settings were adjusted to volume control, flow rate of 200-500 cc/min, with an inspiratory time of 0.55 seconds, and respiratory rate of 75 breaths per minute. Following intubation, the shaved areas were prepared with application of Betadine and subsequent application of 70% ethanol rinse three times.

Four subcutaneous pockets were created surgically on the back of the rat to enable placement of the implants. Following implantation, all incisions were closed with three to four interrupted absorbable sutures (4-0 Vicryl, Ethicon J310, POLYGLACT”910) and the animal was extubated. The rat was housed with access to a standard diet of food and water *ad libitum* for a total of 4 weeks at the Koch Institute for integrative cancer research at Massachusetts Institute of Technology. After 4 weeks, the rat was euthanized. Tissue was then collected and submitted to the Histology Core Facility of the Koch Institute for histology. Slides were stained for Hematoxylin & Eosin (H&E) and digitized by the Histology Core Facility.

## Implanted samples

Samples of each of the materials constituting the aortic sleeve were prepared for subcutaneous implantation. The materials implanted were as follows:

- TPU (sheet of dimensions 20 x 15 x 0.3 mm), constituting the expandable element of the aortic sleeve;
- TPU-coated fabric (sheet of dimensions 20 x 15 x 0.4 mm), constituting the inextensible constraining layer of the aortic sleeve
- Polyurethane, constituting the actuation lines (length = 15 mm)
- Polycarbonate, constituting the connectors (length = 5 mm)

## Results

Images of the slides each of these materials can be found in **Fig. S3**. These images revealed the presence of only a relatively thin fibrous capsule surrounding the implanted material, and no lymphocytic infiltrate was observed. Although the response to these materials may vary across different animal species and implantation sites, these findings suggested that it is unlikely that the materials constituting the band are toxic or cause chronic inflammation to the surrounding tissues.

**Figure S3: Histology studies.** Hematoxylin and eosin (H&E) staining of subcutaneous implants in a murine model of the materials constituting the aortic sleeve. a) Thermoplastic polyurethane (TPU); b) TPU-coated fabric (Oxford fabric, Seattle fabrics Inc.); c) Polyurethane actuation line; d) Polycarbonate connector. Scale bars, 500 μm. In all slides, fibrous capsule appears to be approximately only 50-150 μm thick. This and the absence of a significant lymphocytic infiltrate in all slides suggest that the materials are well tolerated within the body.

# In vivo studies

## Animal preparation

All animal procedures were approved by the Institutional Animal Care and Use Committee (IACUC) of our institute. Yorkshire swine were acquired from Tufts and housed in the Massachusetts General Hospital Center for Comparative Medicine Large Animal Facility. Swine were weighed upon arrival (~38-45kg) and housed in individual pens. The swine were kept under 12-h light/12-h dark cycles with access to a standard diet of food and water *ad libitum*.

### Pre-Implantation procedure

Starting 72 hours prior to the implantation procedure, the animals were given oral amiodarone at a dose of 10 mg/kg every 24 hours. The animals were fasted overnight before the procedure and food was withheld in the morning. Anesthesia was induced with an intramuscular injection using a standard drug cocktail of Telazol (4.4 mg/kg), Xylazine (2.2 mg/kg) and Atropine (0.04 mg/kg). Animals were transported to the operating suite and placed on Isoflurane inhalant at 1-3%. The swine were then intubated with an endotracheal tube (6.5 mm-7.5 mm) and placed on a ventilator with a tidal volume of 12-15 ml/kg with a mixture of isoflurane and oxygen. The swine were positioned supine on the procedure table with a heating pad underneath. Auricular dorsolateral vein was cannulated with an angiocatheter for administration of IV fluids and medications. Immediately prior to the start of the procedure, the animals received an intramuscular injection of buprenorphine (0.005 – 0.01 mg/kg) and carprofen (2-4 mg/kg) and a continuous infusion of fentanyl citrate (5-20 ug/kg/hr). The swine were administered cefazolin (1g), and a constant infusion of amiodarone (0.05 mg/kg/min) and 2% Lidocaine for the duration of the procedure. During the procedure, incisions were made through the skin over the fourth intercostal space and blunt dissection used to separate the muscle layers to access the thoracic cavity.

### Sleeve implantation and tensioning

The sleeve was wrapped around the ascending aorta. Adequate tensioning of the sleeve around the vessel was crucial for the success of the study. Loosely implanted sleeves would fail to result in significant changes in the hemodynamics following aortic constriction, whereas constriction of the aorta by means of sole implantation of the aortic sleeve was to be avoided not to compromise cardiac hemodynamics prior to activation. An example of the peak aortic flow velocity measured on MRI following loose implantation of the sleeve can be found in **Fig. S4**.

### Post-implantation procedure

Once the heart had stabilized, the apical suture and retractor were removed. The lungs were over-inflated for 3 – 4 breaths to prevent pneumothorax. Excess air and fluid were evacuated from the thoracic cavity after closing the cavity using a sterile tube placed into the original incision through the skin and muscle layers. The separated ribs and associated muscle were sutured in two individual layers with 0-vicryl sutures, and the skin was closed with 3-0 nylon sutures. The lines from the aortic sleeve with access ports remained external to the animal, and the animal wore jackets (Tubular Net Bandage, *MEDICHOICE*) to protect the lines. Postoperative analgesia was provided with a transdermal fentanyl patch (1-4ug/kg) and oral carprofen (2-4 mg/kg) for 72 hours. Oral antibiotics (cephalexin 10-30 mg/kg) were also administered for 72 hours post operation.

### Animal preparation for MRI studies

The animals were fasted overnight prior to the MRI procedure and food was withheld in the morning. In the morning, diazepam (4mg/kg) was administered orally in liquid. The animals were transported to the MRI scanning facility. Anesthesia was induced using a standard drug cocktail of Telazol (4.4 mg/kg), Xylazine (2.2 mg/kg) and Atropine (0.04 mg/kg).

The animals were then placed on isoflurane inhalant at 1-3%. The swine were intubated with an endotracheal tube (6.5 - 7.5 mm) and placed on a ventilator with a tidal volume of 12-15 ml/kg with a mixture of isoflurane and oxygen. Auricular dorsolateral vein was cannulated with an angiocatheter for administration of IV fluids. The animals were then carefully transferred onto the MRI scanner bed and connected to the MR compatible Isoflurane system. The body temperature was supported using circulating water heat pad placed between the animal and the MRI table. MRI-compatible ECG pads, pulse oximeter, blood pressure cuff and spirometer were utilized to monitor the animals’ vitals throughout the scanning procedures.

### Animal anesthesia recovery

Following MRI, the animals were fully recovered from anesthesia. Recovery was assessed based on achieving a stable heart rate, blood pressure, and respiratory rate, without further need for any medical or ventilator support. The endotracheal tube was removed once the swallowing reflex was observed. The animals were monitored until they were fully ambulatory, interacted with their environment and stimuli, and regained appetite.

### Animal sacrifice

The swine were placed under anesthesia following the same regiment as described above. After echocardiography, LV catheterization, and thoracic aortic flow measurements, animals were euthanized with saturated potassium chloride (150 mg/kg).

***Figure S4: Effects of aortic sleeve tensioning.*** Peak aortic flow velocity measured on MRI at three degrees of tensioning of the aortic sleeve during implantation. Sample data at a) baseline (BL), intermediate (Int), and full (Full) constriction, and b) for the bicommissural (Bi), unicommissural (Uni), and aortic stenosis (AS) profiles. Both graphs show that adequate tensioning of the sleeve is crucial to achieve significant hemodynamic changes.

## Magnetic resonance imaging

### LV geometry reconstruction

LV geometries were reconstructed semi-automatically from CINE data using Segment (Medviso)8. The automatic segmentation algorithm in Segment was used to identify LV endocardium and epicardium contours of each short-axis slices. Manual adjustment was conducted to correct the contours and single short-axis CINE data were leveraged to improve the inter-slice coherence. End-diastolic volume (EDV) and end-systolic volume (ESV) were measured from the segmented LV geometry and the LVEF estimated. Values of LVEF obtained on D6 at baseline, intermediate, and full constriction as well as for various actuation profiles are reported in **Fig. S5**.

### 4D flow analysis

The aortic mask was segmented manually with 3D Slicer9 using the 4D flow magnitude data. The frame with the greatest magnitude contrast showing the ascending aorta and the aortic arch was chosen for mask reconstruction. Phase data (dX, dY, and dZ) showing the velocity in the in-plane directions (X and Y) and out-of-plane direction (Z) were used to calculate the velocity vector () as follows:

()

where is the encoding velocity. A comparison of the degree of aortic constriction and peak aortic flow velocity measured *in vivo* on MRI and predicted by the CFD model can be found in **Fig. S6**.

To visualize the flow patterns at baseline and for each aortic constriction profile, voxel data were converted into the point cloud using the Visualization Tool Kit (VTK) libraries (VTK, Kitware, Inc., NY). Segmented 2D surface slices were used to represent the point scalars in the 3D domain, and the open-source visualization software ParaView 5.9.1 (Sandia National Labs, Kitware Inc., Los Alamos National Labs) was utilized to visualize the point cloud. The temporal statistics method was applied to compute the averaged velocity vectors in the systolic phase. During the temporal averaging, each timestep was weighted to minimize noise effects on the scalars and accurately calculate the velocity vector field. The point volume interpolator was therefore incorporated into the timeframe with the greatest velocity magnitude to visualize the flow in 3D, and the stream tracer filter was used for visualization of flow. 3D streamlines were color-coded based on the velocity magnitude of the timeframe with the peack aortic flow velocity and plotted to represent the traces along the averaged 3D velocity vector field.

***Figure S5: LVEF MRI measurements.*** Estimates of left ventricular ejection fraction (LVEF) following LV geometry reconstruction on MRI (n = 3) at a) baseline (BL), intermediate (Int), and full (Full) constriction, and b) for the bicommissural (Bi), unicommissural (Uni), and aortic stenosis (AS) constriction profiles. n.s: non-significant; *: *P <* 0.1, **: *P <* 0.05, ***: *P <* 0.01, ****: *P <* 0.001.

***Figure S6: Comparison between MRI and CFD model.*** a) Correlation plot of MRI and computational fluid dynamics (CFD) measurements of aortic constriction (y = 0.45x + 33.4, R2 = 0.75), and b) corresponding Bland-Altman plot. c) Correlation plot of MRI and computational fluid dynamics (CFD) measurements of aortic constriction (y = 0.75x + 0.65, R2 = 0.89), and b) corresponding Bland-Altman plot. Graphs illustrate that the CFD model is able to closely predict hemodynamics measured in vivo on MRI. BL: baseline, Bi: bicommissural, Uni: unicommissural, AS: aortic stenosis.

## Data processing and visualization

Data were processed on MATLAB® R2020a (MathWorks®) and plotted as mean ± S.D. One-way analysis of variance (ANOVA) was performed to determine significance across groups, namely (i) baseline, intermediate, and full aortic constriction, and (ii) baseline, bicommissural, unicommissural, and aortic stenosis profiles. A summary of the hemodynamics measured *in vivo* and corresponding statistical significance matrices can be found in **Table S3-4**.

**Table S3A: *In vivo* hemodynamic measurements at various constriction degrees**. Each trial was averaged across three consecutive cycles. Values across trials are bolded. Data are shown as mean ± S.D.

|  | D0 | Baseline | Intermediate | Full |
| --- | --- | --- | --- | --- |
| **LVEF (echo) [%]** | **55.8 ± 4.0** | **50.3 ± 2.7** | **31.5 ± 2.8** | **10.9 ± 4.2** |
|  | | Baseline | Intermediate | Full |
| **Mean aortic flow (probe) [L min-1]** | | **2.60 ± 0.23** | **1.60 ± 0.18** | **0.52 ± 0.14** |
| *Trial 1* | | 2.66 ± 0.08 | 1.70 ± 0.03 | 0.49 ± 0.03 |
| *Trial 2* | | 2.32 ± 0.10 | 1.38 ± 0.09 | 0.40 ± 0.10 |
| *Trial 3* | | 2.82 ± 0.02 | 1.72 ± 0.06 | 0.68 ± 0.09 |
| **Arterial elastance [mmHg mL-1]** | | **1.86 ± 0.18** | **3.76 ± 0.29** | **24.24 ± 3.13** |
| *Trial 1* | | 1.98 ± 0.05 | 3.98 ± 0.05 | 25.69 ± 5.50 |
| *Trial 2* | | 1.97 ± 0.05 | 3.47 ± 0.32 | 22.71 ± 2.78 |
| *Trial 3* | | 1.61 ± 0.10 | 3.82 ± 0.10 | 24.47 ± 1.74 |
| **Peak left ventricular pressure [mmHg]** | | **90.31 ± 9.45** | **131.10 ± 11.15** | **164.89 ± 9.49** |
| *Trial 1* | | 92.03 ± 0.63 | 117.62 ± 1.80 | 174.69 ± 0.89 |
| *Trial 2* | | 100.26 ± 0.91 | 133.45 ± 5.29 | 166.83 ± 1.38 |
| *Trial 3* | | 78.82 ± 0.92 | 141.96 ± 0.39 | 153.14 ± 0.30 |
| **Stroke volume [mL]** | | **44.02 ± 2.9** | **32.07 ± 4.58** | **6.23 ± 1.00** |
| *Trial 1* | | 42.83 ± 1.00 | 26.24 ± 0.37 | 6.40 ± 1.21 |
| *Trial 2* | | 46.31 ± 2.59 | 34.75 ± 3.67 | 6.90 ± 0.38 |
| *Trial 3* | | 43.78 ± 2.76 | 35.05 ± 1.33 | 4.92 ± 0.55 |

***Table S3B: P values matrices of hemodynamics at various constriction degrees.*** Data from Table S3A. Matrices are symmetric.

| **LVEF (echo)** | | | | | | |
| --- | --- | --- | --- | --- | --- | --- |
|  | D0 | | Baseline | Intermediate | | Full |
| D0 | 1 | |  |  | |  |
| Baseline | 0.49 | | 1 |  | |  |
| Intermediate | 7.99 10-3 | | 2.00 10-2 | 1 | |  |
| Full | 7.65 10-4 | | 1.27 10-3 | 1.45 10-2 | | 1 |
| **Mean aortic flow (probe)** | | | | | | |
|  | | Baseline | | | Intermediate | Full |
| Baseline | | 1 | | |  |  |
| Intermediate | | 1.07 10-9 | | | 1 |  |
| Full | | 9.68 10-10 | | | 9.89 10-10 | 1 |
| **Arterial elastance** | | | | | | |
|  | | Baseline | | | Intermediate | Full |
| Baseline | | 1 | | |  |  |
| Intermediate | | 0.0891 | | | 1 |  |
| Full | | 9.65 10-10 | | | 9.66 10-7 | 1 |
| **Peak left ventricular pressure** | | | | | | |
|  | | Baseline | | | Intermediate | Full |
| Baseline | | 1 | | |  |  |
| Intermediate | | 2.65 10-8 | | | 1 |  |
| Full | | 9.67 10-10 | | | 6.85 10-7 | 1 |
| **Stroke volume** | | | | | | |
|  | | Baseline | | | Intermediate | Full |
| Baseline | | 1 | | |  |  |
| Intermediate | | 1.27 10-8 | | | 1 |  |
| Full | | 9.61 10-10 | | | 9.60 10-10 | 1 |

***Table 4A: In vivo hemodynamic data for various constriction profiles***. Each trial was averaged across three consecutive cycles. Values across trials are bolded. Data are shown as mean ± S.D.

|  | Baseline | Bicommissural | Unicommissural | Aortic Stenosis |
| --- | --- | --- | --- | --- |
| **LVEF (echo) [%]** | **50.3 ± 2.7** | **36.1 ± 8.6** | **16.5 ± 2.1** | **10.9 ± 4.2** |
| **Aortic constriction [%]** | **–** | **49.3 ± 2.5** | **53.0 ± 3.5** | **69.0 ± 2.0** |
| **Peak aortic flow velocity (MRI) [m s-1]** | **1.33 ± 0.26** | **2.29 ± 0.28** | **2.67 ± 0.38** | **3.33 ± 0.20** |
| **Arterial elastance [mmHg mL-1]** | **1.86 ± 0.18** | **3.84 ± 0.55** | **9.40 ± 1.36** | **24.24 ± 3.13** |
| *Trial 1* | 1.98 ± 0.05 | 3.14 ± 0.05 | 8.29 ± 1.17 | 25.69 ± 5.50 |
| *Trial 2* | 1.97 ± 0.05 | 4.29 ± 0.14 | 10.96 ± 0.40 | 22.71 ± 2.78 |
| *Trial 3* | 1.61 ± 0.10 | 4.07 ± 0.19 | 9.19 ± 0.53 | 24.47 ± 1.74 |
| **Peak left ventricular pressure [mmHg]** | **90.31 ± 9.45** | **134.27 ± 10.76** | **155.50 ± 7.67** | **164.89 ± 9.49** |
| *Trial 1* | 92.03 ± 0.63 | 120.39 ± 0.96 | 150.69 ± 0.65 | 174.69 ± 0.89 |
| *Trial 2* | 100.26 ± 0.91 | 144.32 ± 0.23 | 165.67 ± 1.24 | 166.83 ± 1.38 |
| *Trial 3* | 78.82 ± 0.92 | 137.90 ± 1.27 | 149.59 ± 0.91 | 153.14 ± 0.30 |
| **Stroke volume [mL]** | **44.02 ± 2.9** | **31.64 ± 1.06** | **14.56 ± 1.65** | **6.23 ± 1.00** |
| *Trial 1* | 42.83 ± 1.00 | 32. 41 ± 0.41 | 15.09 ± 2.00 | 6.40 ± 1.21 |
| *Trial 2* | 46.31 ± 2.59 | 31.22 ± 0.63 | 13.35 ± 1.40 | 6.90 ± 0.38 |
| *Trial 3* | 43.78 ± 2.76 | 31.48 ± 1.36 | 15.20 ± 0.74 | 4.92 ± 0.55 |

***Table S4B: P values matrices of hemodynamics for various constriction profile.*** Data from Table S4A. Matrices are symmetric.

| **LVEF (echo)** | | | | | | | |
| --- | --- | --- | --- | --- | --- | --- | --- |
|  | Baseline | | Bicommissural | | Unicommissural | | Aortic Stenosis |
| Baseline | 1 | |  | |  | |  |
| Bicommissural | 0.15 | | 1 | |  | |  |
| Unicommissural | 9.16 10-3 | | 5.94 10-2 | | 1 | |  |
| Aortic Stenosis | 5.22 10-3 | | 2.62 10-2 | | 0.71 | | 1 |
| **Aortic constriction** | | | | | | | |
|  |  | | Bicommissural | | Unicommissural | | Aortic Stenosis |
| Bicommissural | – | 1 | |  | |  | |
| Unicommissural | – | 0.30 | | 1 | |  | |
| Aortic Stenosis | – | 2.88 10-4 | | 8.99 10-4 | | 1 | |
| **Peak aortic flow velocity (MRI)** | | | | | | | |
|  | Baseline | | Bicommissural | | Unicommissural | | Aortic Stenosis |
| Baseline | 1 | |  | |  | |  |
| Bicommissural | 0.01 | | 1 | |  | |  |
| Unicommissural | 1.14 10-3 | | 0.38 | | 1 | |  |
| Aortic Stenosis | 8.81 10-5 | | 7.08 10-3 | | 0.07 | | 1 |
| **Arterial elastance** | | | | | | | |
|  | Baseline | | Bicommissural | | Unicommissural | | Aortic Stenosis |
| Baseline | 1 | |  | |  | |  |
| Bicommissural | 0.09 | | 1 | |  | |  |
| Unicommissural | 4.65 10-9 | | 6.08 10-7 | | 1 | |  |
| Aortic Stenosis | 3.77 10-9 | | 3.77 10-9 | | 3.77 10-9 | | 1 |
| **Peak left ventricular pressure** | | | | | | | |
|  | Baseline | | Bicommissural | | Unicommissural | | Aortic Stenosis |
| Baseline | 1 | |  | |  | |  |
| Bicommissural | 3.94 10-9 | | 1 | |  | |  |
| Unicommissural | 3.77 10-9 | | 2.09 10-4 | | 1 | |  |
| Aortic Stenosis | 3.76 10-9 | | 4.88 10-7 | | 0.17 | | 1 |
| **Stroke volume** | | | | | | | |
|  | Baseline | | Bicommissural | | Unicommissural | | Aortic Stenosis |
| Baseline | 1 | |  | |  | |  |
| Bicommissural | 3.78 10-9 | | 1 | |  | |  |
| Unicommissural | 3.77 10-9 | | 3.79 10-9 | | 1 | |  |
| Aortic Stenosis | 3.77 10-9 | | 3.76 10-9 | | 3.77 10-9 | | 1 |

# Supplementary References

1. Rosalia, L., Ozturk, C., Van Story, D., Horvath, M. & Roche, E. T. Object-oriented lumped-parameter modeling of the cardiovascular system for physiological and pathophysiological conditions. *Adv. theory simulations* **4**, (2021).

2. Heldt, T., Shim, E. B., Kamm, R. D., Mark, R. G. & Massachusetts. Computational modeling of cardiovascular response to orthostatic stress. *J. Appl. Physiol.* **92**, 1239–1254 (2002).

3. Dassault Systèmes. SIMULIA Living Heart Human Model User Guide. (2017).

4. Baillargeon, B., Rebelo, N., Fox, D. D., Taylor, R. L. & Kuhl, E. The living heart project: A robust and integrative simulator for human heart function. *Eur. J. Mech. A/Solids* **48**, 38–47 (2014).

5. Genet, M., Lee, L. C., Baillargeon, B., Guccione, J. M. & Kuhl, E. Modeling Pathologies of Diastolic and Systolic Heart Failure. *Ann. Biomed. Eng.* **44**, 112–127 (2016).

6. Holman, D. M., Brionnaud, R. M. & Abiza, Z. *Solution to industry benchmark problems with the lattice-Boltzmann code Xflow*. *European Congress on Computational Methods in Applied Sciences and Engineering* (2012).

7. Ducros, F., Nicoud, F., Poinsot, T. & Dynamics, I. for C. F. *Wall-Adapting Local Eddy-Viscosity Models for Simulations in Complex Geometries*. (ICFD, Oxford University Computing Laboratory, 1998).

8. Medviso. *Segment CMR Instructions For Use*. http://www.medviso.com (2021).

9. Kikinis, R., Seve, P. & Fillion-Robin, J.-C. *3D Slicer Documentation*. (2021).

# Supplementary Videos

- Video S1: Aortic constriction profiles – mock circulatory loop
- Video S2: Aortic constriction profiles – finite element analysis
- Video S3: Aortic flow echocardiography during progressive aortic constriction
- Video S4: 4D aortic flow – computational fluid dynamics model
